# Supplementary material for: 彫刻家の現場(アトリエ)から(60)津田裕子
Source: Royal Society of Chemistry journal article supplement (doi:10.1039/c7cc09913d), 2010-04-01
Supplement: c7cc09913d1.pdf [file c7cc09913d1.pdf]

## **Supporting Information for**

# **Sulfur Nanocomposites as Positive Electrode Materials for Rechargeable Potassium-sulfur Batteries**

Yu Liu, Weigang Wang, Jing Wang, Yi Zhang, Yusong Zhu, Yuhui Chen, Lijun Fu,\*

Yuping Wu\*

College of Energy Science and Engineering, Institute of Advanced Materials, Nanjing

Tech University, Nanjing 211800, Jiangsu Province, China

## Experimental

Synthesis: pyrolyzed polyacrylonitrile/sulfur composite (SPAN) was prepared through a modified process of a previous report.<sup>1</sup> Sulfur was purchased from the Aladdin (Shanghai, China). Polyacrylonitrile (PAN) was purchased from the Aldrich. First, sulfur and polyacrylonitrile in a mass ratio of 4:1 were manually ground to a uniform color and then transferred to a crucible. The mixture was preheated at 155°C for 1 h and 450°C for 5 h in Ar with a heating rate of 5°C min<sup>-1</sup>. The obtained sample is denoted as SPAN. Carbonized PAN was also prepared by going through a similar heat treatment aforementioned and denoted as CPAN.

Material Characterization: XRD measurements were performed by using a Rigaku D/max-RB instrument using Cu K $\alpha$  radiation ( $\lambda = 1.5418 \text{ \AA}$ ) at a range of 10–90°. Brurauer Emmerr Teller (BET) surface area was measured using a Tristar II3020 instrument by adsorption of nitrogen at 77 K. The content of sulfur is detected by ICP test. The detailed morphology and microstructure of the as-prepared materials were determined by FE-SEM (JEOL, JSM-7100F). XPS (Kratos AXIS Ultra DLD) was applied to study the change of valence state of elements in SPAN. The Raman spectra were collected using an alpha 300 M+ Raman Microscope. Fourier-transform infrared (FTIR) spectra were recorded on a Nicolet Nexus 670 Fourier transform infrared spectrometer (FT-IR) with the KBr pellets method. For characterization of the samples after cycling, they were protected in Argon atmosphere except a short air exposure during the transfer process for the XPS measurement.

Electrochemical Measurements: Coin cells were assembled in a glove box containing pure argon gas. The working electrodes consisted of 80% SPAN active material, 10% acetylene black as conductive agent and 10% polyvinylidene fluoride (PVDF) as binder (using N-methyl-2-pyrrolidone as solvent). In the electrode, the weight of SPAN is  $\sim 1 \text{ mg cm}^{-2}$ . Potassium discs were used as both the counter and reference electrodes, 0.8 M KPF<sub>6</sub> in a mixture of ethylene carbon (EC)-diethyl carbonate (DEC) (1:1 v/v) was used as the electrolyte. Glass fibre (GF/D) from Whatman was used as separator. Galvanostatic and rate charge - discharge tests were

performed in a potential range of 0.8 - 2.9 V vs. K<sup>+</sup>/K using a multichannel battery testing system (LAND CT2001A, P. R. China). Cyclic voltammetry (CV) was recorded on a CHI 660C at a scanning rate of 0.1 mV s<sup>-1</sup> within the same potential range. The AC impedance spectra were analyzed using a CHI 660C from 100 kHz to 0.001 Hz.

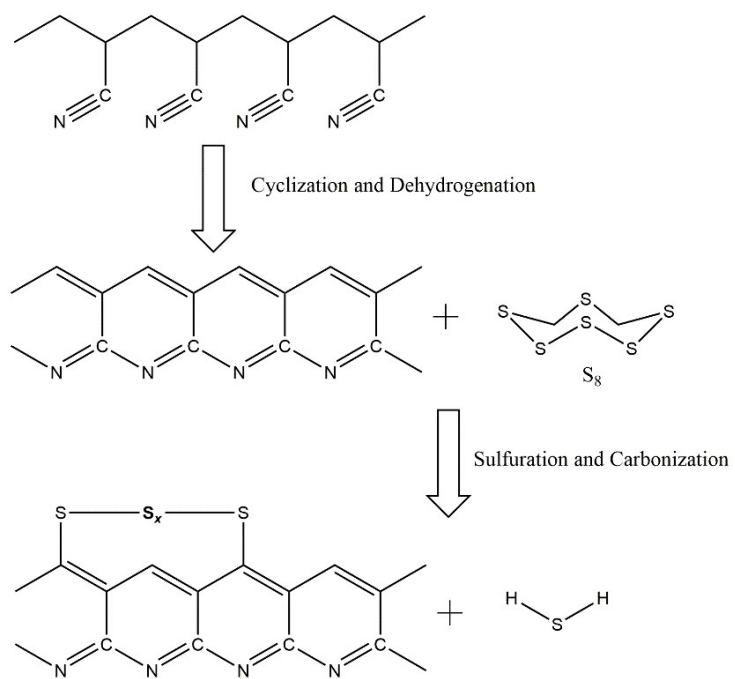

**Figure S1.** Schematic synthetic process of SPAN ( $0 \leq x \leq 6$ ).

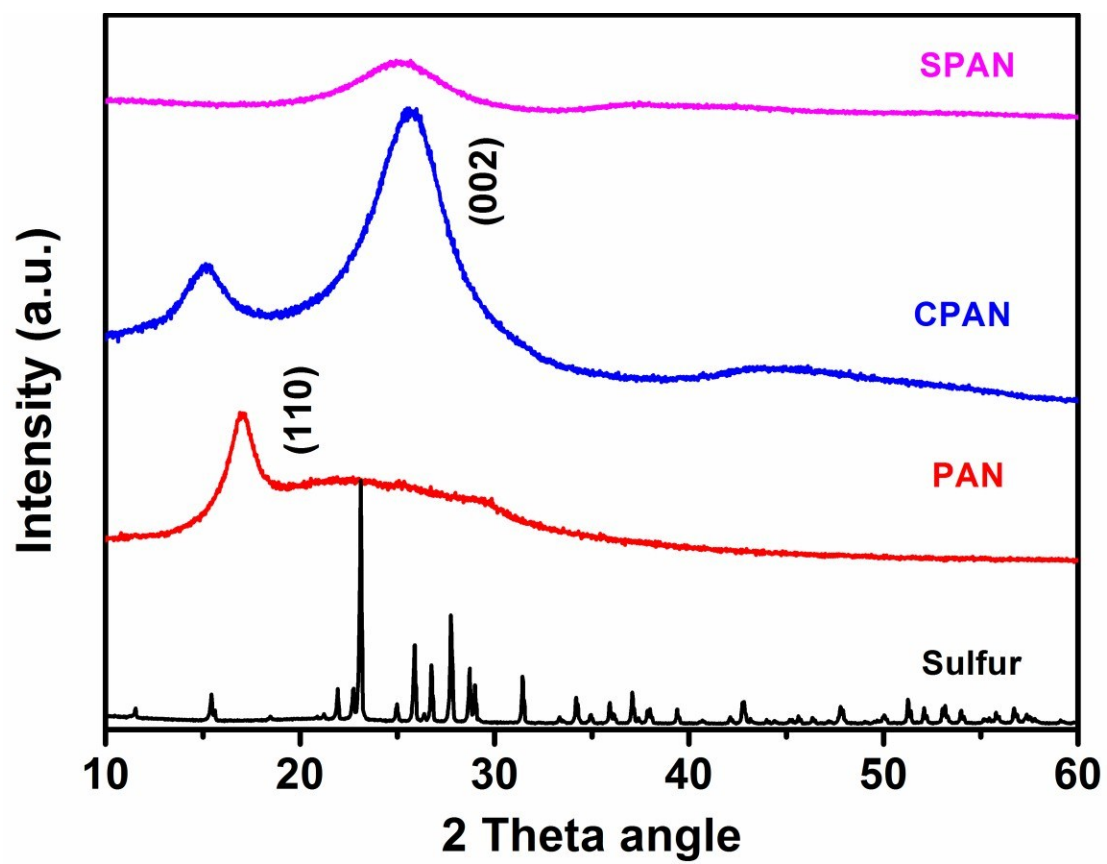

**Figure S2.** XRD patterns of SPAN, CPAN, PAN, and elemental Sulfur.

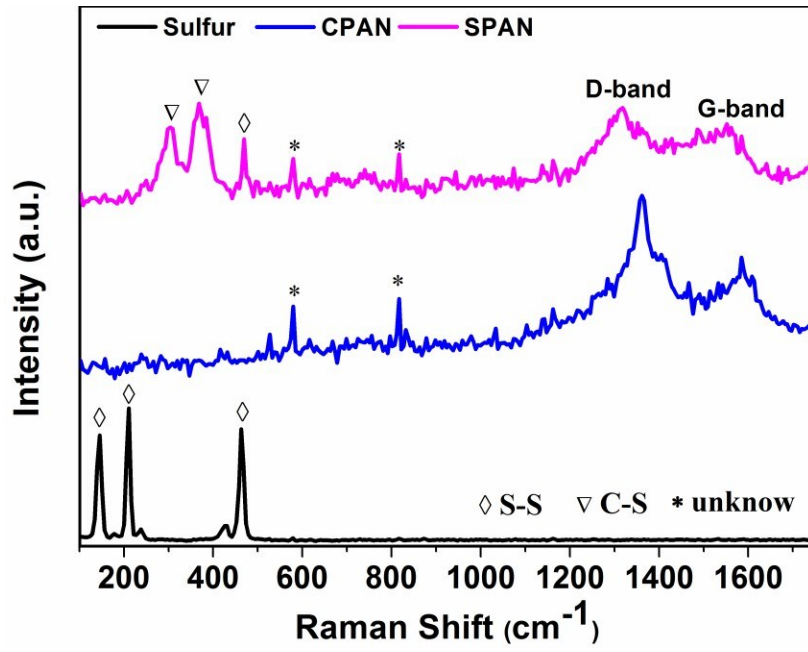

**Figure S3.** Raman spectra of SPAN, CPAN, and Sulfur.

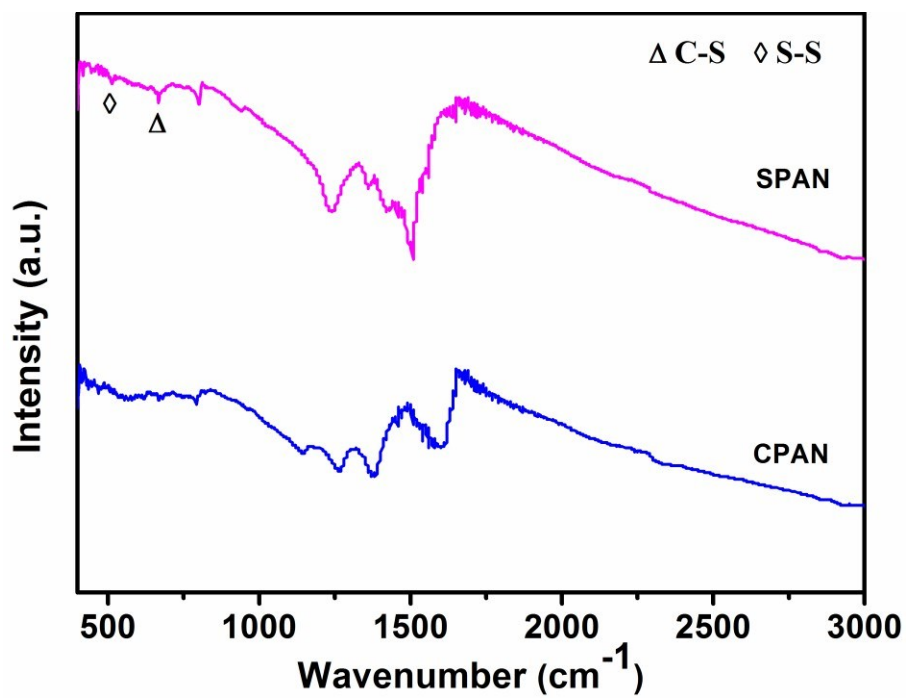

Figure S4. FT-IR spectra of SPAN and CPAN

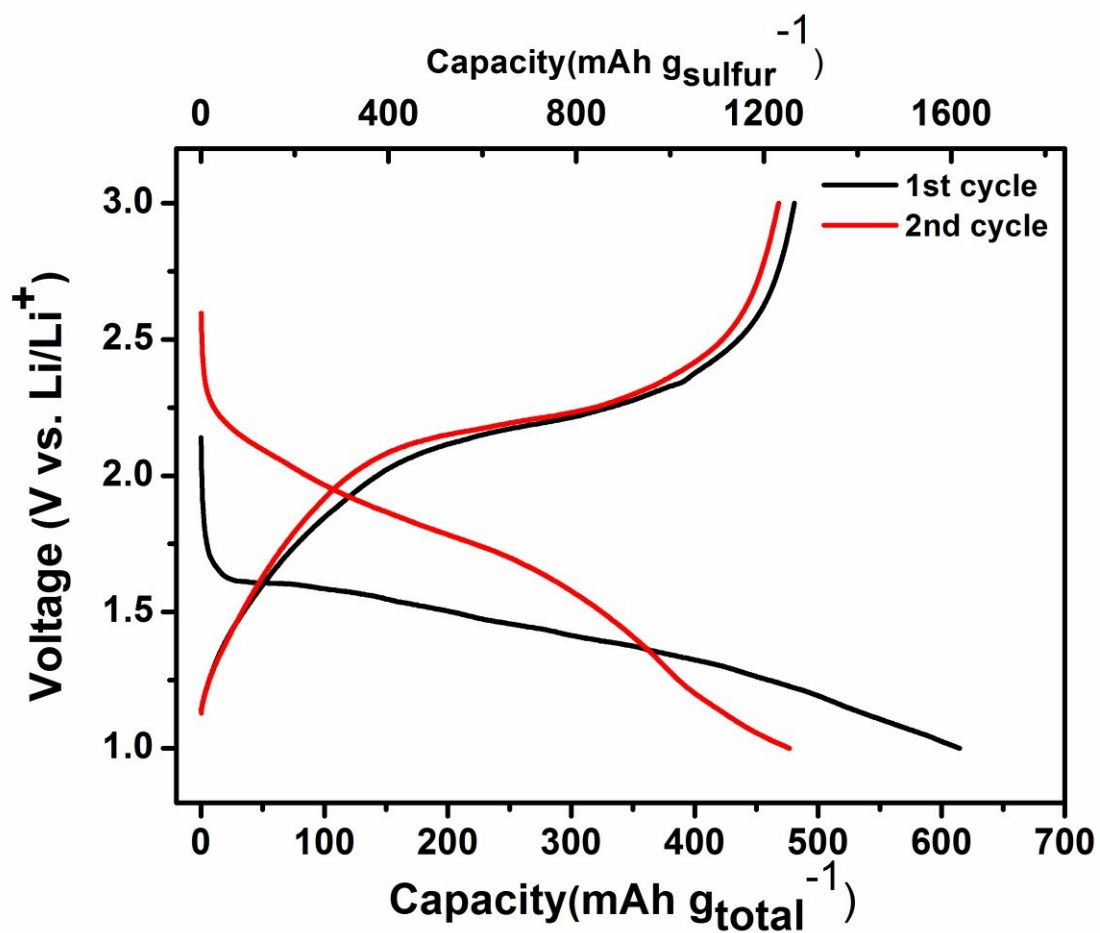

**Figure S5.** Electrochemical discharge and charge curves of SPAN toward Li at 1 C for the first two cycles in the potential range of 1–3 V vs Li/Li<sup>+</sup>.



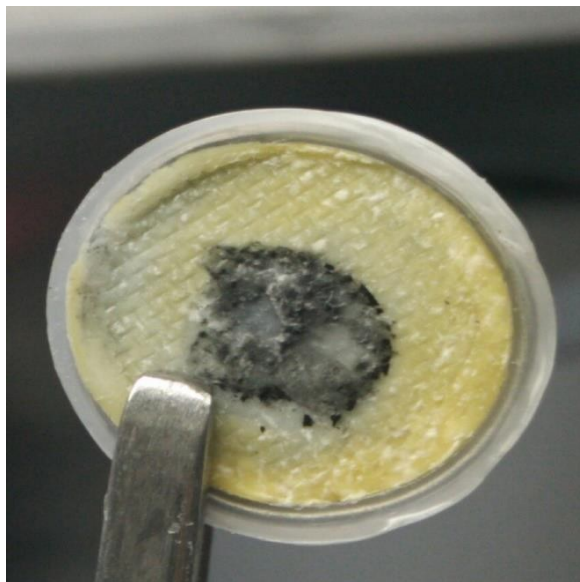

**Figure S6.** Digital image of glass-fiber separator inside a K-SPAN coin cell after 500 cycles, taken in a glovebox, showing the separator turns yellowish after cycling, possibly due to the decomposition of electrolyte.

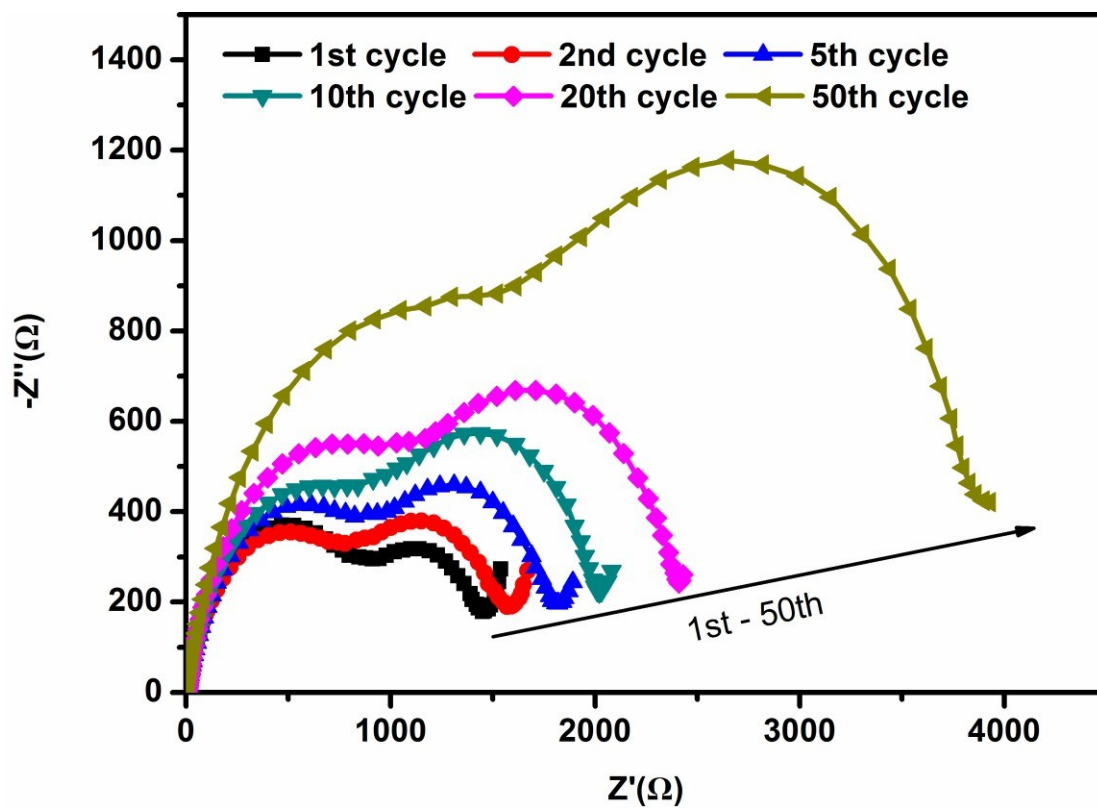

**Figure S7.** The Nyquist plots of the fully charged SPAN after cycling at 1 C for different times.

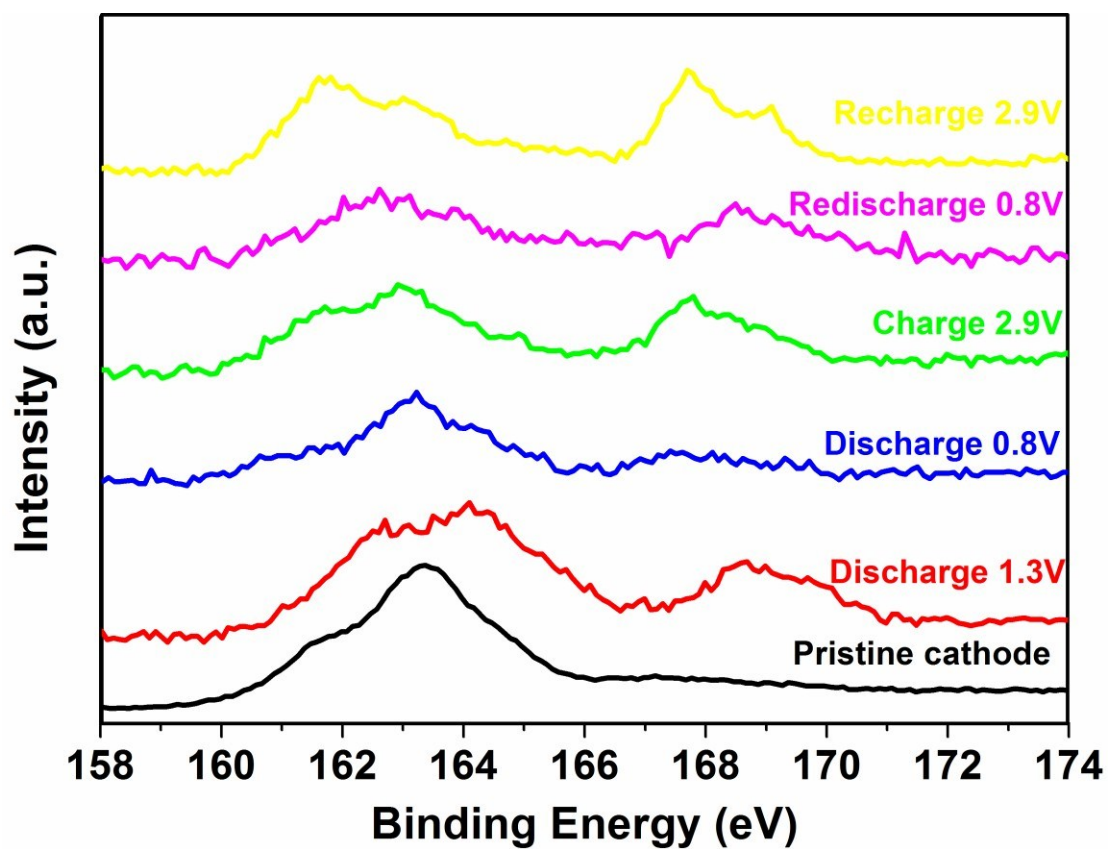

**Figure S8.** Ex-situ S 2p XPS spectra of SPAN during the first two cycles.

**Table S1.** Electrochemical performances of positive electrode materials for K-ion and K- batteries.

| Material                                         | Voltage Range(V) | Capacity (mAh/g) at Current density (A/g)                                                       | Initial capacity (mAh/g) | 2 <sup>nd</sup> capacity (mAh/g) | Highest capacity (mAh/g) | Cycle performance                      | Stable CE | Longest cycle number | Ref.      |
|--------------------------------------------------|------------------|-------------------------------------------------------------------------------------------------|--------------------------|----------------------------------|--------------------------|----------------------------------------|-----------|----------------------|-----------|
| SPAN                                             | 0.8 - 2.9        | 265.5, 0.025<br>228, 0.075<br>200, 0.125<br>160, 0.25<br>111, 0.5<br>83.7, 0.75                 | 270.2                    | 270.5                            | 275.2                    | 149 mAh/g after 100 cycle at 0.125 A/g | ~100%     | 100 cycle            | This work |
| KVPO <sub>4</sub> F                              | 2.0 - 4.8        | ~76, 0.013<br>~75, 0.026<br>~73, 0.0665<br>~72, 0.133<br>~71, 0.266<br>~70, 0.399<br>~67, 0.665 | ~68                      | ~70                              | ~72                      | ~70 mAh/g after 50 cycle at 0.013 A/g  | ~90%      | 50 cycle             | 2         |
| KVOPO <sub>4</sub>                               | 2.0-4.8          | ~70, 0.0133-0.226<br>~69, 0.399<br>~67, 0.532<br>~66, 0.665                                     | ~65                      | ~68                              | ~73                      | ~70 mAh/g after 50 cycle at 0.013 A/g  | ~90%      | 50 cycle             | 2         |
| KTi <sub>2</sub> (PO <sub>4</sub> ) <sub>3</sub> | 1.2 -2.8         | ~80, 0.064<br>~78, 0.128<br>~73, 0.256<br>~65, 0.64                                             | ~75.6                    | ~72.6                            | ~90                      | 83 mAh/g after 100 cycle at 0.064 A/g  | ~100%     | 100 cycle            | 3         |

|                                          |           |                                                                                     |                                                   |                                                 |                                                   |                                                                           |       |            |    |
|------------------------------------------|-----------|-------------------------------------------------------------------------------------|---------------------------------------------------|-------------------------------------------------|---------------------------------------------------|---------------------------------------------------------------------------|-------|------------|----|
| $K_3V_2(PO_4)_3$                         | 2.5 - 4.3 | 54, 0.02<br>45, 0.05<br>30, 0.1<br>25, 0.2                                          | 54                                                | 53                                              | 54                                                | 52 mAh/g after 100 cycle at 0.02 A/g                                      | ~100% | 100 cycle  | 4  |
| $K_{0.67}Ni_{0.17}Co_{0.17}Mn_{0.66}O_2$ | 2.0 - 4.3 | 76.5, 0.02<br>70.2, 0.04<br>65.6, 0.06<br>58, 0.08<br>49, 0.1                       | 76.5                                              | 76                                              | 76.5                                              | 66.8 mAh/g after 100 cycle at 0.02 A/g                                    | ~100% | 100 cycle  | 5  |
| KPBNP                                    | 2.0 - 4.0 | 76, 0.05<br>65, 0.1<br>56.1, 0.2<br>46.1, 0.3<br>36, 0.4                            | 76.7                                              | 74.5                                            | 76.7                                              | 73.2 mAh/g after 100 cycle at 0.05 A/g                                    | ~90%  | 150 cycle  | 6  |
| PTCDA                                    | 1.5 -3.5  | 117, 0.05<br>92, 0.1<br>88, 0.2<br>73, 0.5                                          | 117                                               |                                                 | 117                                               | 90 mAh/g after 200 cycle at 0.05 A/g                                      | ~100% | 200 cycle  | 7  |
| PAQS                                     | 1.5 -3.4  | 198, 0.02                                                                           | 211                                               | 198                                             | 211                                               | 142.5 mAh/g after 50 cycle at 0.02 A/g                                    | ~100% | 50 cycle   | 8  |
| NI-KMHCF                                 | 2.5 -4.6  | /                                                                                   | ~86                                               | ~95                                             | ~110                                              | ~100 mAh/g after 100 cycle at 0.156 A/g                                   | ~100% | 100 cycle  | 9  |
| PANI@CMK-3/S                             | 1.2 - 2.4 | ~500, 0.05                                                                          | 523.5<br>mAh/(g <sub>sulfur</sub> <sup>-1</sup> ) | 490<br>mAh/(g <sub>sulfur</sub> <sup>-1</sup> ) | 523.5<br>mAh/(g <sub>sulfur</sub> <sup>-1</sup> ) | 329.3 mAh/(g <sub>sulfur</sub> <sup>-1</sup> ) after 50 cycle at 0.05 A/g | ~100% | 50 cycle   | 10 |
| Sulfur<br>(150°C)                        | 12 - 3.0  | ~400, 0.33mA/cm <sup>2</sup> ;<br>~320, 1.32;<br>~300, 2.31;<br>~285, 3.3; 260, 9.9 | ~280                                              |                                                 | ~310                                              | ~300 mAh/g after 100 cycle at 2.31mA/cm <sup>2</sup>                      | ~100% | 1000 cycle | 11 |

## References:

1. J. L. Wang, J. Yang, J. Y. Xie and N. X. Xu, *Adv. Mater.*, 2002, **14**, 963.
2. K. Chihara, A. Katogi, K. Kubota and S. Komaba, *Chem. Commun.*, 2017, **53**, 5208-5211.
3. J. Han, Y. Niu, S. J. Bao, Y. N. Yu, S. Y. Lu and M. Xu, *Chem. Commun.*, 2016, **52**, 11661-11664.
4. J. Han, G.-N. Li, F. Liu, M. Wang, Y. Zhang, L. Hu, C. Dai and M. Xu, *Chem. Commun.*, 2017, **53**, 1805-1808.
5. C. Liu, S. Luo, H. Huang, Z. Wang, A. Hao, Y. Zhai and Z. Wang, *Electrochem. Commun.*, 2017, **82**, 150-154.
6. C. Zhang, Y. Xu, M. Zhou, L. Liang, H. Dong, M. Wu, Y. Yang and Y. Lei, *Adv. Funct. Mater.*, 2017, **27**, 1604307.
7. Y. Chen, W. Luo, M. Carter, L. Zhou, J. Dai, K. Fu, S. Lacey, T. Li, J. Wan, X. Han, Y. Bao and L. Hu, *Nano Energy*, 2015, **18**, 205-211.
8. Z. Jian, Y. Liang, I. A. Rodríguez-Pérez, Y. Yao and X. Ji, *Electrochem. Commun.*, 2016, **71**, 5-8.
9. L. Xue, Y. Li, H. Gao, W. Zhou, X. Lu, W. Kaveevitvichai, A. Manthiram and J. B. Goodenough, *J. Am. Chem. Soc.*, 2017, **139**, 2164-2167.
10. Q. Zhao, Y. X. Hu, K. Zhang and J. Chen, *Inorg. Chem.*, 2014, **53**, 9000-9005.
11. X. Lu, M. E. Bowden, V. L. Sprenkle and J. Liu, *Adv. Mater.*, 2015, **27**, 5915-5922.
